# Supplementary material
Source: PubMed Central journal article supplement (PMC2887317)
Supplement: NIHMS204762-supplement-01.pdf [file NIHMS204762-supplement-01.pdf]

## Supplemental Data Inventory

### The ISG15 conjugation system broadly targets newly synthesized proteins: implications for the anti-viral function of ISG15

Larissa A. Durfee, Nancy Lyon, Kyungwoon Seo, and Jon M. Huibregtse

**Figure S1:** Figure S1 shows ISGylation of previously identified, exogenously expressed target proteins in addition to those shown in Figure 2B.

**Figure S2:** Figure S2 shows ISGylation of human, non-human, and viral exogenously expressed target proteins in addition to those shown in Figure 3A and 3B.

**Figure S3:** Figure S3 provides another example of ISGylation of non-overlapping fragments in addition to those shown in Figure 3C.

**Figure S4:** Figure S4A shows that the exogenously expressed mRNAs are more abundant than the corresponding endogenously expressed mRNAs. This suggests that while the exogenously expressed proteins in Figure 4A were not present at a higher steady-state level, they were translated at a higher rate. Figure S4B corresponds to Figure 4C and shows that TAP IQGAP1 and TAP p53 are long-lived proteins.

**Figure S5:** Figure S5 corresponds to Figure 5B and shows that ISG15 conjugation occurred only in cells that were transfected with the conjugation components.

**Figure S6:** Figure S6 corresponds to Figure 6D and shows that HA-Herc5- $\Delta$ RCC and  $-\Delta$ 100 are enzymatically active, but cannot conjugate ISG15 to target proteins.

**Table S1:** Table S1 provides a list of all endogenously expressed proteins examined and corresponds to Figures 1B, 1C, and 2A.

**Table S2:** Table S2 provides a list of exogenously expressed proteins examined and corresponds to Figures 2B, 3A, and 3B.

**Table S3:** Table S3 is referenced in the experimental procedures section and provides a list of plasmids and antibodies used in this study.

## Supplemental Data

The ISG15 conjugation system broadly targets newly synthesized proteins: implications for the anti-viral function of ISG15

Larissa A. Durfee, Nancy Lyon, Kyungwoon Seo, and Jon M. Huibregtse

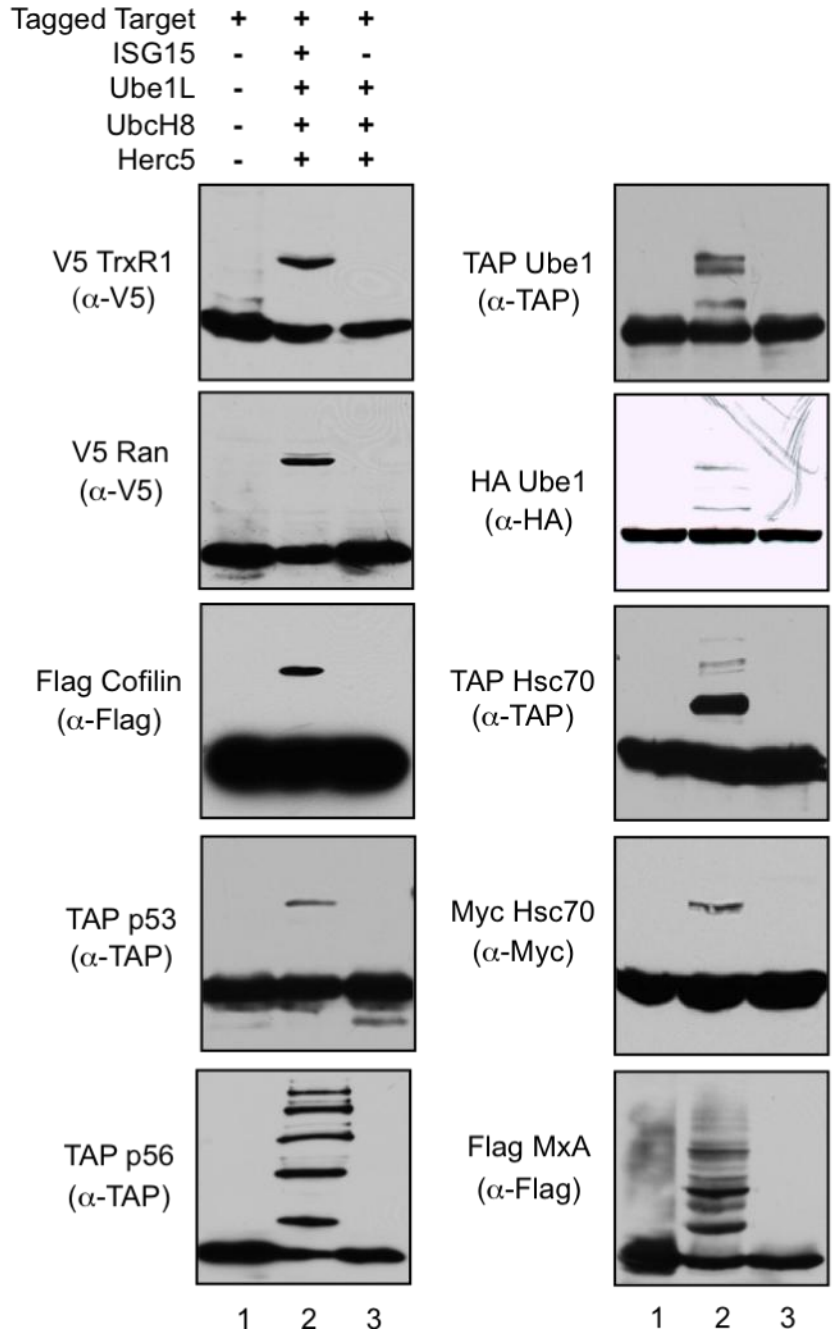

**Figure S1: ISGylation of previously identified, exogenously expressed proteins (related to Figure 2B).** HEK293T cells were transfected with a plasmid expressing an epitope-tagged target protein and either no additional plasmids (lane 1), or with plasmids expressing Ube1L, UbchH8, Herc5, and ISG15 (lane 2), or plasmids expressing Ube1L, UbchH8, and Herc5 (lane 3). Cell extracts were prepared 48 hours post-transfection and analyzed by immunoblotting using antibodies against the indicated epitope tag.

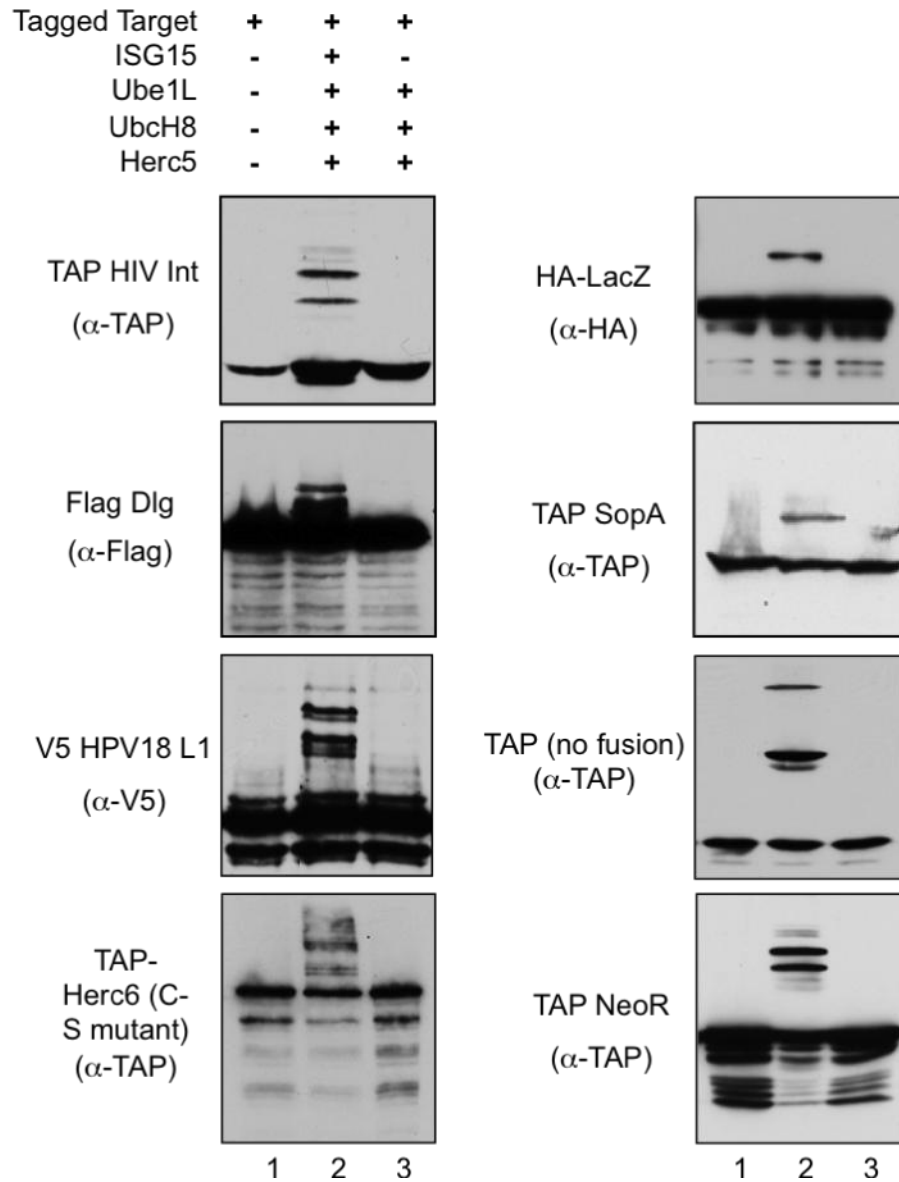

**Figure S2: ISGylation of additional human, non-human, and viral exogenously expressed proteins (Related to Figure 3A and 3B).** HEK293T cells were transfected with a plasmid expressing an epitope-tagged target protein and either no additional plasmids (lane 1), or with plasmids expressing Ube1L, UbcH8, Herc5, and ISG15 (lane 2), or plasmids expressing Ube1L, UbcH8, and Herc5 (lane 3). Cell extracts were prepared 48 hours post-transfection and analyzed by immunoblotting using antibodies against the indicated epitope tag.

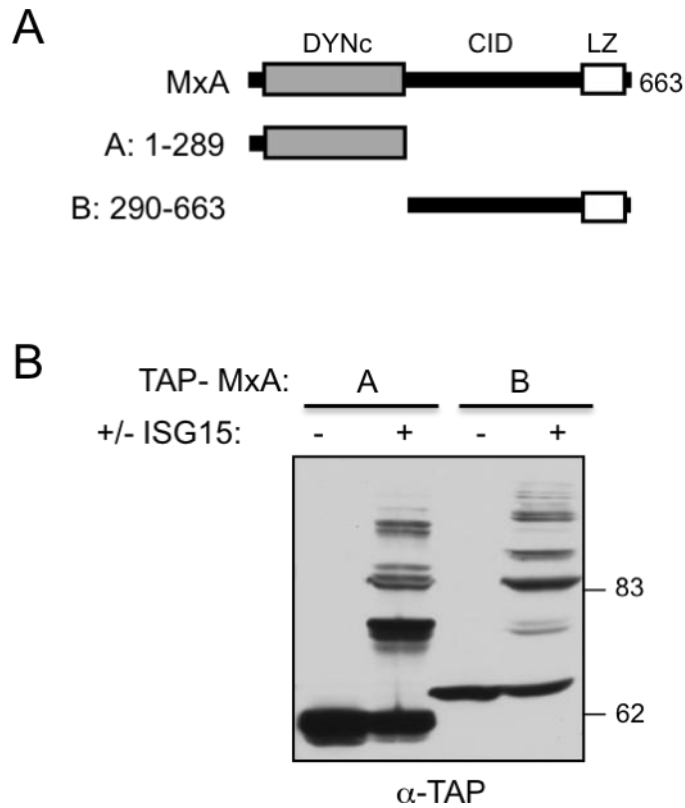

**Figure S3: ISGylation of non-overlapping fragments of MxA (Related to Figure 3C).** **(A).** A schematic of MxA is shown, along with two non-overlapping fragments (A-B, with numbering of amino acids shown). DYNc, Dynamin domain; CID, central interactive domain; LZ, leucine zipper motifs. **(B).** Plasmids expressing TAP-tagged fragments A and B were transfected into HEK293T cells along with plasmids expressing Ube1L, UbcH8, Herc5, with or without ISG15. Cell extracts were prepared 48 hours post-transfection and analyzed by immunoblotting with an antibody against the TAP tag.

A

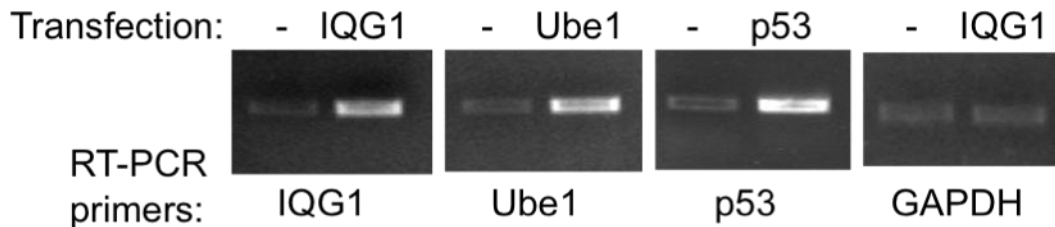

B

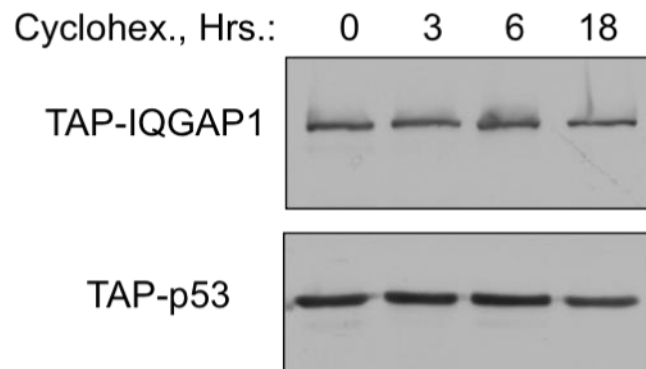

**Figure S4: (A) Exogenously expressed mRNAs are more abundant than the corresponding endogenously expressed mRNAs (Related to Figure 4A).** Total mRNA was isolated from untransfected HEK293T cells (-) or cells transfected with TAP-IQGAP1 (IQG1), TAP-Ube1 (Ube1), or TAP-53 (p53) expression plasmids for 24 hours. After DNase treatment, cDNA was prepared with and without reverse transcriptase. RT-PCR reactions were performed using primer sets that detect both the endogenously and exogenously expressed mRNAs. A GAPDH primer set was used as a control for equal RNA in the each set of samples and is shown for the IQGAP1-transfected samples. **(B) TAP-IQGAP1 and TAP-p53 are long-lived proteins (Related to Figure 4C).** Plasmids expressing TAP-IQGAP1 or TAP-p53 were transfected into HEK293T cells. Twenty-four hours after transfection, cells were treated with cycloheximide at a concentration of 40  $\mu\text{g/ml}$ . Extracts were then prepared immediately, or 3, 6 hours, or 18 hours later. Immunoblots with anti-TAP antibody indicated that the protein levels did not decline more than 2-fold over 18 hours

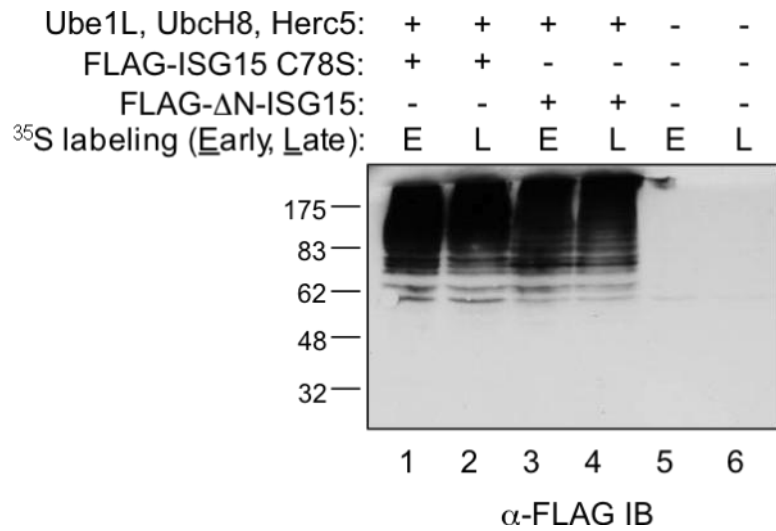

**Figure S5: ISG15 conjugation in <sup>35</sup>S labeled extracts.** Extracts correspond to those used in immunoprecipitations in Figure 5B. This demonstrates that ISG15 conjugation occurred in all cells that were transfected with the conjugation components (lanes 1-4) and not in untransfected cells (lanes 5-6).

|   |               |   |   |    |              |              |
|---|---------------|---|---|----|--------------|--------------|
| A | Tagged Target | + | + | +  | +            | +            |
|   | ISG15         | - | + | +  | +            | +            |
|   | Ube1L         | + | + | +  | +            | +            |
|   | UbcH8         | + | + | +  | +            | +            |
|   | Herc5         | - | - | WT | $\Delta$ 100 | $\Delta$ RCC |

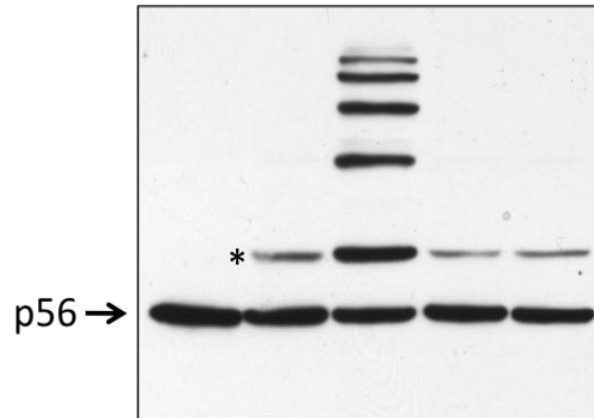

B

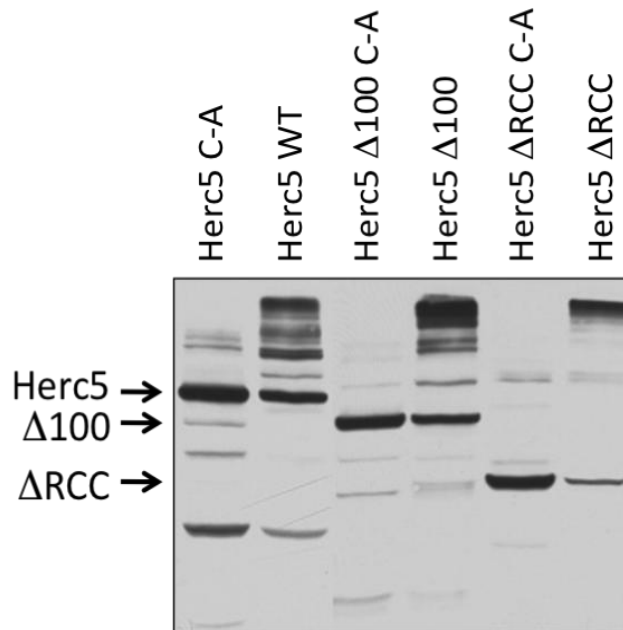

**Figure S6: TAP-Herc5- $\Delta$ RCC and - $\Delta$ 100 cannot conjugate ISG15 to target proteins, but are enzymatically active (Related to Figure 6D).** (A) Plasmids expressing FLAG-p56 were transfected into HEK293T cells along with plasmids expressing Ube1L, UbcH8, ISG15, and NTAP-Herc5 or the indicated Herc5 mutants. Cell extracts were prepared 48 hours post-transfection and ISGylation of p56 was determined by immunoblotting with anti-FLAG antibody. (B) HEK293T cells were transfected with ISG15, Ube1L, UbcH8, and the indicated TAP-tagged Herc5 expression plasmids. Herc5 proteins and ISGylated forms of Herc5 were detected with anti-TAP antibody.



**Table S1. Endogenously expressed proteins**

| Target protein | Previously Identified Target? | Interferon-induced? | Detectable ISGylation in IFN-treated HeLa cells? | Detectable ISGylation in 4-Plasmid Transfection? |
|----------------|-------------------------------|---------------------|--------------------------------------------------|--------------------------------------------------|
| Ube1           | yes <sup>1, 2, 3</sup>        | no                  | yes                                              | yes                                              |
| IQGAP1         | yes <sup>1</sup>              | no                  | yes                                              | yes                                              |
| Hsc70          | yes <sup>1, 2, 3, 4</sup>     | no                  | no                                               | no                                               |
| Moesin         | yes <sup>1</sup>              | no                  | no                                               | no                                               |
| Tubulin        | yes <sup>3, 4</sup>           | no                  | no                                               | no                                               |
| Matrin 3       | yes <sup>1</sup>              | no                  | no                                               | no                                               |
| Enolase        | yes <sup>1, 2, 3, 4</sup>     | no                  | no                                               | no                                               |
|                |                               |                     |                                                  |                                                  |
| MxA            | yes <sup>1, 3</sup>           | yes                 | yes <sup>1</sup>                                 | na                                               |
| RIG-I          | yes <sup>1</sup>              | yes                 | yes <sup>1</sup>                                 | na                                               |
| p56            | yes <sup>1, 3</sup>           | yes                 | yes <sup>1</sup>                                 | na                                               |
| PKR            | yes <sup>1</sup>              | yes                 | no                                               | na                                               |
| RIG-G          | yes <sup>1</sup>              | yes                 | no                                               | na                                               |
| OAS1           | no                            | yes                 | no                                               | na                                               |
| PLSCR1         | no                            | yes                 | no                                               | na                                               |
|                |                               |                     |                                                  |                                                  |
| E6AP           | no                            | no                  | no                                               | no                                               |
| hnRNPk         | no                            | no                  | no                                               | no                                               |
| Nucleophosmin  | no                            | no                  | no                                               | no                                               |

<sup>1</sup>Zhao, et al., 2005<sup>2</sup>Giannakopoulos et al, 2005<sup>3</sup>Wong, et al., 2006<sup>4</sup>Takeuchi, et al., 2006

**Table S2. Proteins expressed by plasmid transfection**

| Target Protein                                | Previously Identified Target? | Detectable ISGylation in 5-Plasmid Transfection? |
|-----------------------------------------------|-------------------------------|--------------------------------------------------|
| IQGAP1 (TAP, FLAG)                            | yes <sup>1</sup>              | yes                                              |
| Moesin (V5)                                   | yes <sup>1</sup>              | yes                                              |
| Ube1 (V5, TAP, HA)                            | yes <sup>1, 2, 3</sup>        | yes                                              |
| TrxR1 (V5)                                    | yes <sup>1, 3</sup>           | yes                                              |
| Ran (V5)                                      | yes <sup>1, 3</sup>           | yes                                              |
| Cofilin (FLAG)                                | yes <sup>1, 3</sup>           | yes                                              |
| p56 (TAP)                                     | yes <sup>1, 3</sup>           | yes                                              |
| Hsc70 (TAP, Myc)                              | yes <sup>1, 2, 3, 4</sup>     | yes                                              |
| MxA (FLAG)                                    | yes <sup>1, 3</sup>           | yes                                              |
|                                               |                               |                                                  |
| p53 (HA, TAP, FLAG)                           | no                            | yes                                              |
| E6AP (C-A mutant; TAP)                        | no                            | yes                                              |
| Herc6 (C-S mutant HA, TAP)                    | no                            | yes                                              |
| Herc4 (TAP)                                   | no                            | yes                                              |
| Dlg (FLAG)                                    | no                            | yes                                              |
| Paxillin (C-term.; FLAG)                      | no                            | no                                               |
| Wbp2 (FLAG)                                   | no                            | no                                               |
|                                               |                               |                                                  |
| <i>Shigella</i> OSPG (TAP)                    | na                            | yes                                              |
| <i>Salmonella</i> SopA (TAP)                  | na                            | yes                                              |
| TAP epitope, no fusion                        | na                            | yes                                              |
| <i>S. cerevisia</i> Rsp5 (untagged)           | na                            | yes                                              |
| <i>E. coli</i> Neo <sup>R</sup> protein (TAP) | na                            | yes                                              |
| <i>E. coli</i> $\beta$ -gal. (TAP, HA)        | na                            | yes                                              |
| HPV16 L1 protein (untagged) and HPV18L1 (V5)  | na                            | yes                                              |
| HIV Integrase (TAP)                           | na                            | yes                                              |
| GFP                                           | na                            | no                                               |

<sup>1</sup>Zhao, et al., 2005<sup>2</sup>Giannakopoulos et al, 2005<sup>3</sup>Wong, et al., 2006<sup>4</sup>Takeuchi, et al., 2006

**Table S3. Plasmids and antibodies used in this study**

| TARGET PLASMIDS          | NOTES                                                                                                                             |
|--------------------------|-----------------------------------------------------------------------------------------------------------------------------------|
| pcTAP                    | Previously described (Dastur et al., 2006)                                                                                        |
| pcTAP IQGAP1, A, B, C    | The cDNA of IQGAP1 was previously described (Ho et al., 1999).                                                                    |
| pcMV10 IQGAP1            | Same as above, but IQGAP1 was cloned into the pcMV10 vector.                                                                      |
| pcTAP Ube1               | Ube1 was previously described (Beaudenon and Huibregtse, 2005; Huibregtse et al., 1995), and was subcloned into the pcTAP vector. |
| pcV5 Ube1                | Same as above, but Ube1 was cloned into the pcV5 vector.                                                                          |
| pcHA Ube1                | Same as above, but Ube1 was cloned into the pcHA vector.                                                                          |
| pcV5 Moesin              | Previously described (Zhao et al., 2005)                                                                                          |
| pcV5 TrxR1               | Previously described (Zhao et al., 2005)                                                                                          |
| pcV5 Ran                 | Previously described (Zhao et al., 2005)                                                                                          |
| pcFLAG Cofilin           | Cofilin cDNA was cloned into the pcFLAG vector.                                                                                   |
| pcTAP Hsc70              | pcTAP Hsc70 was provided by R. Krug.                                                                                              |
| pcTAP E6AP (C-A mutant)  | The cDNA of E6AP C-A mutant was previously described (Huibregtse et al., 1995), and was subcloned into the pcTAP vector.          |
| pcHA p53                 | The cDNA of p53 was previously described (Huibregtse et al., 1991), and was subcloned into the pcHA vector.                       |
| pcTAP p53                | Same as above, but p53 was subcloned into the pcTAP vector.                                                                       |
| pcHA $\beta$ -Gal        | $\beta$ -Gal was amplified from pSV $\beta$ gal (Promega) and cloned into the pcHA vector.                                        |
| pcTAP Herc6 (C-A mutant) | Herc6 was amplified from cDNA, cloned into the pcTAP vector, and the active site cysteine mutated (C985A).                        |
| pcTAP p56                | His-3X FLAG-p56 was provided by Dr. Robert Krug (UT Austin, Austin, TX), and was subcloned into the pcTAP vector.                 |
| pcTAP MxA, A, B          | pcTAP MxA was provided by Dr. Robert Krug (UT Austin, Austin, TX), and was used to generate the TAP fusion proteins A and B.      |
| pcMV10 MxA               | Same as above, but MxA was cloned into the pcMV10 vector.                                                                         |
| pcTAP HIV Integrase      | HIV-1 Integrase cDNA was subcloned into the pcTAP vector.                                                                         |
| pcTAP SopA               | The cDNA of SopA was subcloned from a plasmid provided by J. Chen (Purdue University) into the pcTAP vector.                      |
| p16shell, p18shell       | Provided by John Schiller (NCI, Bethesda, MD)                                                                                     |
| pcV5-HPV18L1             | HPV18 L1 ORF was cloned into the pcV5 vector                                                                                      |
| pcTAP OSPG               | OSPG was amplified from Shigella genomic DNA provided by S. Payne, and cloned into the pcTAP vector.                              |
| pcMyc Hsc70              | pcMyc Hsc70 was provided by Dr. D. Manor.                                                                                         |
| pcFLAG Dlg               | Dlg cDNA (Lee et al., 1997), and was cloned into pcFLAG vector.                                                                   |
| pcMV10 GFP               | GFP was amplified from pEGFP-C1 (Clontech) and cloned into the pcMV10 vector (Sigma)                                              |

| <b>PLASMIDS FOR ISG15 CONJUGATION</b>   | <b>NOTES</b>                                                                                                                                                                                            |
|-----------------------------------------|---------------------------------------------------------------------------------------------------------------------------------------------------------------------------------------------------------|
| pc3XFLAG ISG15 & pcHA ISG15             | Previously described (Zhao et al., 2005)                                                                                                                                                                |
| pcFLAG-ISG15 & pcFLAG- $\Delta$ N-ISG15 | Plasmids were made by introducing a sequence encoding an N-terminal FLAG epitope (DYKDDDDK) into a pcDNA3.1 plasmid containing either full length human ISG15 or residues 80-158 of ISG15 ( $\Delta$ N) |
| pcDNA Ube1L                             | Previously described (Zhao et al., 2005)                                                                                                                                                                |
| pcDNA Ube1L $\Delta$ UFD                | Previously described (Durfee et al., 2008)                                                                                                                                                              |
| pcDNA UbcH8                             | Previously described (Zhao et al., 2005)                                                                                                                                                                |
| pcDNA UbcH8 F62A                        | Previously described (Dastur et al., 2006)                                                                                                                                                              |
| pCS2+MT (Myc)-Herc5                     | M. Ohtsubo of Hiroshima University                                                                                                                                                                      |
| pcTAP Herc5 pcTAP Herc5 C994A           | Previously described (Dastur et al., 2006)                                                                                                                                                              |
| pcHA Herc5 and pcHA Herc5 $\Delta$ RCC  | Herc5 and Herc5 $\Delta$ RCC were subcloned from the pcTAP vector into the pcHA vector (Dastur et al., 2006)                                                                                            |

| <b>ANTIBODIES</b>                     | <b>NOTES</b>                                                   |
|---------------------------------------|----------------------------------------------------------------|
| Anti-Hsc70                            | Santa Cruz Technologies                                        |
| Anti-HPV16 L1                         | Santa Cruz Technologies                                        |
| Anti-IQGAP1                           | BD Biosciences                                                 |
| Anti-Ube1                             | Abcam                                                          |
| Anti-Moesin                           | Cell Signaling Technology                                      |
| Anti-Flag M2                          | Sigma Aldrich                                                  |
| Anti-V5                               | AbD Serotec                                                    |
| Anti-HA                               | Covance                                                        |
| Anti-C-Myc                            | Covance                                                        |
| Anti-TAP (Peroxidase-anti-peroxidase) | Rockland Immunochemicals for Research                          |
| Anti-p56                              | Kindly provided by Ganes Sen (Cleveland Clinic, Cleveland, OH) |
| Anti-Herc5                            | Kindly provided by Enzo Life Sciences                          |
| Anti-Puromycin                        | Kindly provided by Peter Walter (UCSF, San Francisco, CA)      |
| Anti-E6AP                             | Prepared as described (Talis et al., 1998)                     |

## References for Supplementary Tables and Figures

- Beaudenon, S., and Huibregtse, J.M. (2005). High level expression and purification of recombinant E1 enzyme. *Meth Enzym in press*.
- Dastur, A., Beaudenon, S., Kelley, M., Krug, R.M., and Huibregtse, J.M. (2006). Herc5, an interferon-induced HECT E3 enzyme, is required for conjugation of ISG15 in human cells. *J Biol Chem* 281, 4334-4338.
- Ho, Y.D., Joyal, J.L., Li, Z., and Sacks, D.B. (1999). IQGAP1 integrates Ca<sup>2+</sup>/calmodulin and Cdc42 signaling. *J Biol Chem* 274, 464-470.
- Huibregtse, J.M., Scheffner, M., Beaudenon, S., and Howley, P.M. (1995). A family of proteins structurally and functionally related to the E6-AP ubiquitin-protein ligase. *Proc Natl Acad Sci U S A* 92, 2563-2567.
- Huibregtse, J.M., Scheffner, M., and Howley, P.M. (1991). A cellular protein mediates association of p53 with the E6 oncoprotein of human papillomavirus types 16 or 18. *EMBO J* 10, 4129-4135.
- Lee, S.S., Weiss, R.S., and Javier, R.T. (1997). Binding of human virus oncoproteins to hDlg/SAP97, a mammalian homolog of the Drosophila discs large tumor suppressor protein. *Proc Natl Acad Sci U S A* 94, 6670-6675.
- Talis, A.L., Huibregtse, J.M., and Howley, P.M. (1998). The role of E6AP in the regulation of p53 protein levels in human papillomavirus (HPV)-positive and HPV-negative cells. *J Biol Chem* 273, 6439-6445.
- Zhao, C., Denison, C., Huibregtse, J.M., Gygi, S., and Krug, R.M. (2005). Human ISG15 conjugation targets both IFN-induced and constitutively expressed proteins functioning in diverse cellular pathways. *Proc Natl Acad Sci U S A* 102, 10200-10205.
